# Supplementary material
Source: Springer Nature journal article supplement (https://www.springerprofessional.de/resource/supplementary/13638_2011_473_MOESM9_ESM.pdf/11897796)
Supplement: MOESM9 [file 11897796]

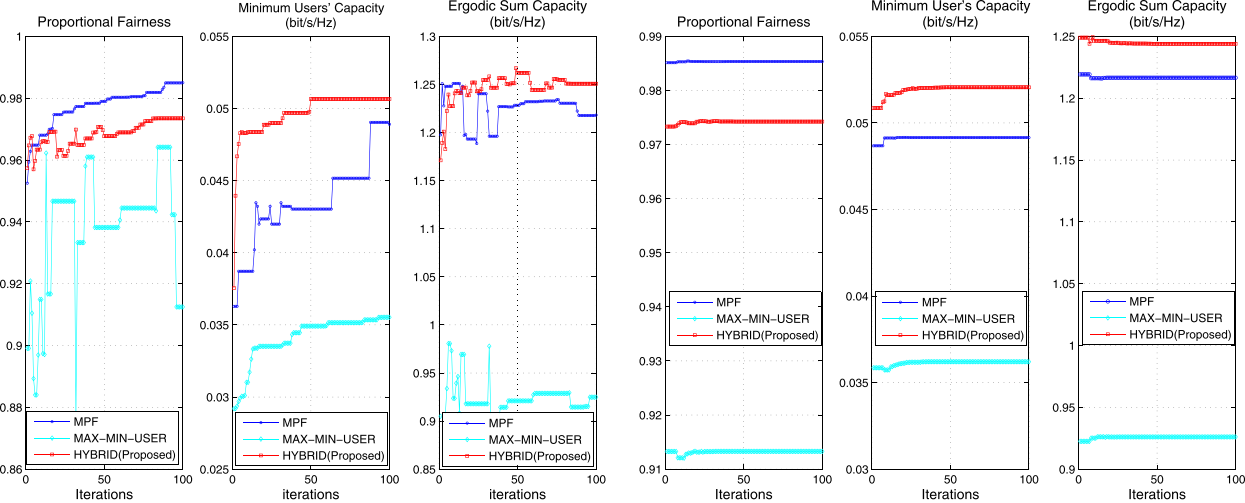

(a) Convergence in Subchannel Allocation

(b) Convergence in Power Allocation

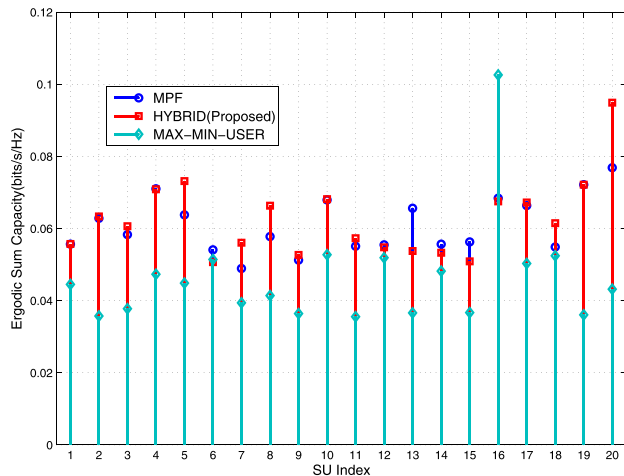

(c) Final Resource Allocation Results
